# Supplementary material for: A novel oxime-derived 3d–4f single-molecule magnet exhibiting two single-ion magnetic relaxations
Source: Royal Society of Chemistry journal article supplement (doi:10.1039/c6dt02003h), 2016-01-01
Supplement: c6dt02003h1.pdf [file c6dt02003h1.pdf]

## Electronic supplementary information

### A novel oxime-derived 3d-4f single-molecule magnet exhibiting two single-ion magnetic relaxations

Hui-Ming Dong,<sup>a</sup> Yan Li,<sup>b</sup> Zhong-Yi Liu,<sup>b</sup> En-Cui Yang,<sup>\*b</sup> and Xiao-Jun Zhao<sup>\*a, b</sup>

<sup>a</sup> *Department of Chemistry, Collaborative Innovation Center of Chemical Science and Engineering, Nankai University, Tianjin 300071, People's Republic of China.*

<sup>b</sup> *College of Chemistry, Key Laboratory of Inorganic-Organic Hybrid Functional Material Chemistry, Ministry of Education, Tianjin Key Laboratory of Structure and Performance for Functional Molecules, Tianjin Normal University, Tianjin 300387, People's Republic of China*

**Table S1** Calculation of the agreement between the coordination polyhedron of the studied complexes with various ideal polyhedra using the SHAPE program<sup>\*</sup>

| Ideal polyhedron geometry | SAP ( $D_{4d}$ ) | BTPR ( $C_{2v}$ ) | TDD ( $D_{2d}$ ) |
|---------------------------|------------------|-------------------|------------------|
| Agreement factor for Dy1  | 1.692            | 1.842             | 2.554            |
| Agreement factor for Dy2  | 1.142            | 1.546             | 1.444            |

<sup>\*</sup> SAP = Square antiprism, BTPR= Biaugmented trigonal prism and TDD = Triangular dodecahedron

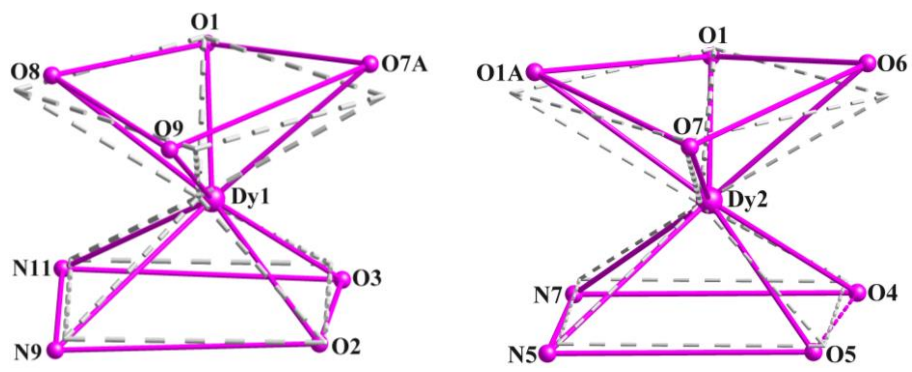

**Fig. S1** Superposition diagrams of ideal square antiprism and the Dy<sup>III</sup> site in **1**.

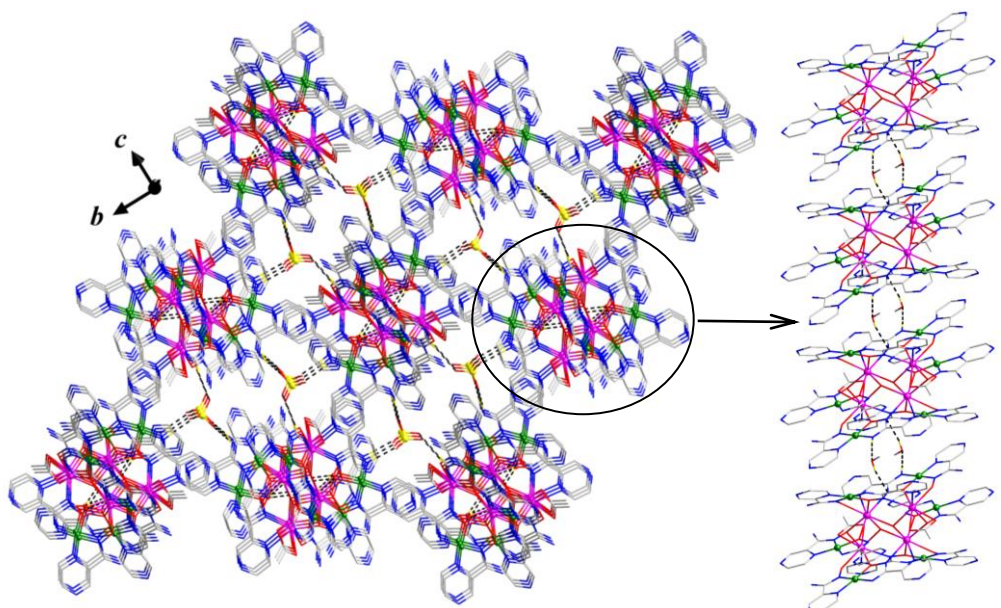

**Fig. S2** 3D supramolecular structure of **1** generated by intermolecular hydrogen-bonding interactions.

**Table S2** Hydrogen-bonding parameters (Å, deg) in **1**<sup>a</sup>

| D–H...A                            | <i>d</i> (D–H) | <i>d</i> (H...A) | <i>d</i> (D...A) | ∠DHA  |
|------------------------------------|----------------|------------------|------------------|-------|
| N(8)–H(8A)...O(14) <sup>#3</sup>   | 0.88           | 2.36             | 3.240(6)         | 175.8 |
| O(14)–H(14)...N(7) <sup>#4</sup>   | 0.84           | 2.28             | 3.091(6)         | 163.3 |
| N(12)–H(12A)...O(10) <sup>#1</sup> | 0.88           | 2.39             | 3.250(7)         | 166.5 |
| N(16)–H(16B)...O(12) <sup>#2</sup> | 0.88           | 2.19             | 2.901(8)         | 138.0 |

\* Symmetry codes: <sup>#1</sup> 1 – *x*, 1 – *y*, 1 – *z*; <sup>#2</sup> 1 – *x*, *y* + 1/2, 1/2 – *z*; <sup>#3</sup> *x*, 1/2 – *y*, *z* + 1/2; <sup>#4</sup> 1 – *x*, *y* – 1/2, 3/2 –

*z*.

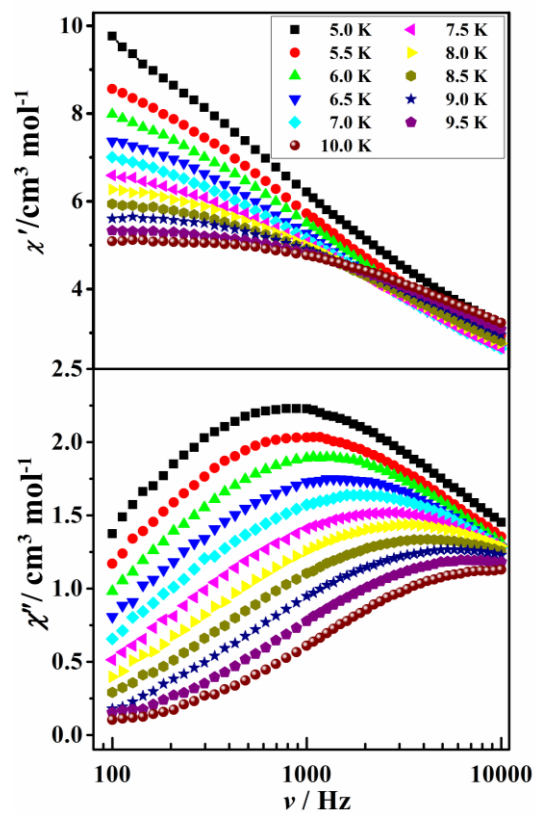

**Fig. S3** Frequency dependence of the ac susceptibilities for **1** measured under  $H_{dc} = 0$  and  $H_{ac} = 3.5$  Oe.

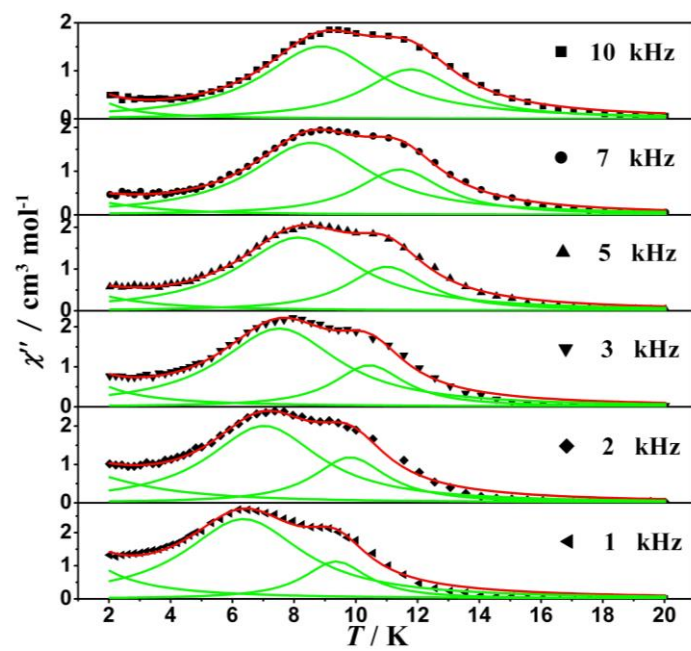

**Fig. S4** Fitting of the peak position to determine the individual relaxation time for each frequency (Green and red lines represent the individual and sum of the peaks, respectively).

**Table S3** Fitting results for the Cole–Cole plots of **1** under 1000 kOe dc field by using the sum of two modified Debye models

| $T / \text{K}$ | $\chi_{\text{S,tot}}$ | $\Delta\chi_1$ | $\tau_1 / \text{s}$ | $\alpha_1$ | $\Delta\chi_2$ | $\tau_2 / \text{s}$ | $\alpha_2$ |
|----------------|-----------------------|----------------|---------------------|------------|----------------|---------------------|------------|
| 5.0            | 0.46562               | 5.41146        | 4.47374E-4          | 0.25277    | 5.91834        | 1.82E-3             | 0.01984    |
| 6.0            | 0.38566               | 7.03173        | 3.05467E-4          | 0.22163    | 5.14239        | 2.35E-3             | 0.05238    |
| 7.0            | 0.37927               | 6.45552        | 1.37377E-4          | 0.21256    | 5.12681        | 1.84E-3             | 0.09032    |
| 7.2            | 0.37507               | 6.12109        | 1.24247E-4          | 0.20907    | 4.99070        | 1.76E-3             | 0.07971    |
| 7.6            | 0.38708               | 5.59913        | 8.44669E-5          | 0.20302    | 5.22188        | 1.36E-3             | 0.12481    |
| 8.0            | 0.37243               | 5.68223        | 5.72014E-5          | 0.22211    | 4.80010        | 9.09E-4             | 0.13273    |
| 8.5            | 0.36788               | 5.30329        | 3.97028E-5          | 0.22952    | 4.31512        | 5.95E-4             | 0.11735    |
| 9.0            | 0.33401               | 5.55692        | 2.51521E-5          | 0.26735    | 3.65907        | 3.44E-4             | 0.10815    |
| 10.0           | 1.07891               | 4.25399        | 1.33020E-5          | 0.21102    | 3.21132        | 1.25E-4             | 0.11290    |
